# Supplementary material
Source: PubMed Central journal article supplement (PMC4186826)
Supplement: Supp_Fig1.pdf [file Supp_Fig1.pdf]

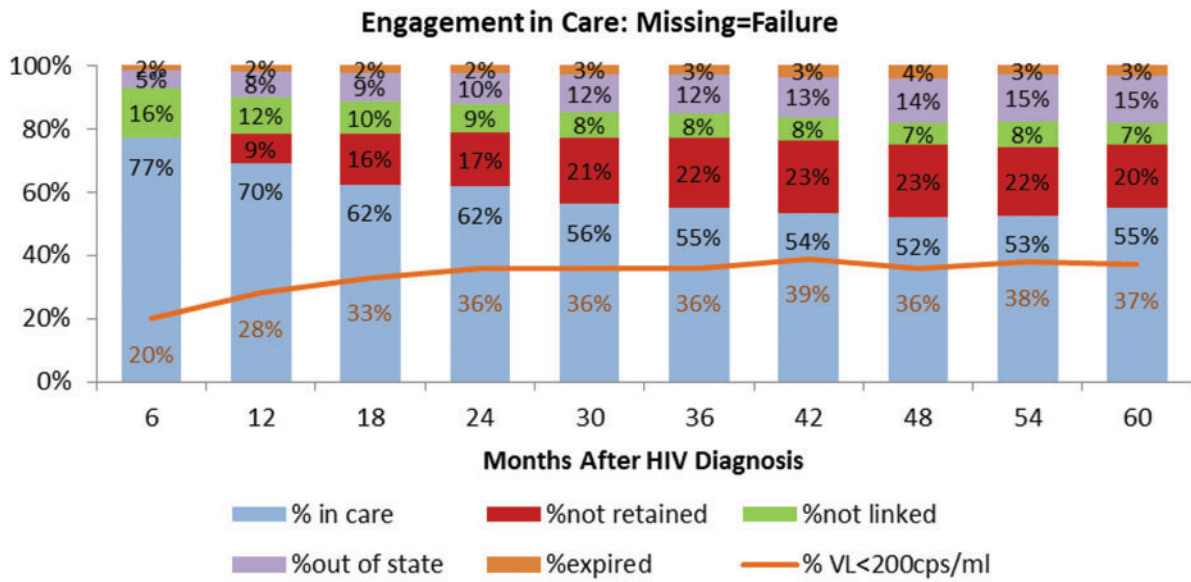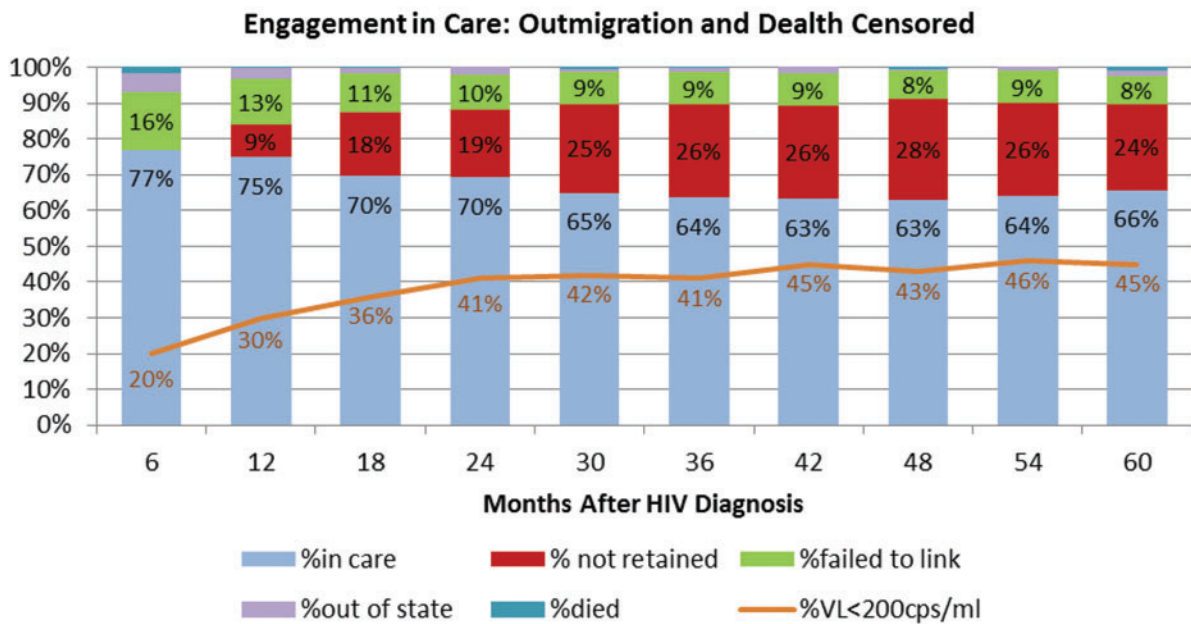

**SUPPLEMENTARY FIG. S1.** Engagement in care over the 5 years following HIV diagnosis for a cohort of 615 individuals diagnosed with HIV from 2005 through 2009.
