# Supplementary material
Source: PubMed Central journal article supplement (PMC4186826)
Supplement: Supp_Table1.pdf [file Supp_Table1.pdf]

## Supplementary Data

SUPPLEMENTARY TABLE 1. OUTCOMES FOR RETENTION  
IN CARE 18 MONTHS AFTER HIV DIAGNOSIS BY DEFINITION  
OF RETENTION FOR COHORT OF 615 NEWLY  
HIV-DIAGNOSED INDIVIDUALS FROM 2005 THROUGH 2009

| <i>Definition of retention</i>                                   | <i>Number (percent) newly-<br/>diagnosed retained in care<br/>18 mo after HIV diagnosis</i> |
|------------------------------------------------------------------|---------------------------------------------------------------------------------------------|
| 1 visit in the prior 12 months                                   | 459 (75%)                                                                                   |
| 1 visit in the prior 6 months                                    | 386 (63%)                                                                                   |
| 2 visits in the prior 12 months<br>separated by at least 90 days | 418 (68%)                                                                                   |
